# Supplementary material for: Transcriptome Analysis Identifies Immune Markers Related to Visceral Leishmaniasis Establishment in the Experimental Model of BALB/c Mice
Source: Front Immunol. 2019 Nov 26;10:2749. doi: 10.3389/fimmu.2019.02749 (PMC6902045; doi:10.3389/fimmu.2019.02749)
Supplement: Supplementary file 2 [file Table_2.XLSX]

## Sheet: GO_BP Terms in COMMON DEGS
GO_BP Terms enriched with DEGs commonly expressed in PBS and p8-CPA160-189 mice at 16 weeks post L. infantum challenge
GO_TERM_BP_4	Count	Genes	Benjamini-adjusted p-value
GO:0045087~innate immune response	66	S100A8, AIF1, S100A9, TLR4, IGHM, C1QC, TLR8, NLRC5, CASP4, CLEC4E, SH2D1B1, OASL2, GBP10, LTF, NOS2, LAG3, RAB27A, TNIP3, GBP8, GBP7, GBP5, BST2, CAMP, SOCS1, NLRP3, IL21, C1QA, C1QB, C1QBP, MB21D1, SLPI, UBD, GBP4, GBP3, CLEC5A, GBP2, IFIH1, TNF, CCL8, GBP2B, CCL4, MIF, CCL6, IL12RB1, TAP1, IIGP1, TYROBP, ZBP1, IRGM1, IRGM2, IL23R, LGALS3, CFB, MSRB1, SLAMF8, STAT1, FCGR1, LGALS9, LCN2, IFIT1, …	4.58E-36
GO:0031347~regulation of defense response	50	SIGLECE, IFIH1, TNF, PTGS2, S100A8, C6, S100A9, CCL8, TLR4, CCL4, TLR8, ADA, CCL6, MIF, NLRC5, IL12RB1, CASP4, SLC1A3, SH2D1B1, ALOX5AP, AOAH, TAP1, SERPINB10, TGM2, LTF, NOS2, LAG3, ZBP1, TNIP3, IL23R, GBP5, SOCS3, SOCS1, SLAMF8, IL21, NLRP3, FCGR1, LGALS9, FCGR3, IFIT1, PLA2G4A, PARP9, C1QBP, CCR5, MB21D1, CCR2, IRF1, CLEC7A, TRAFD1, GBP4	4.05E-22
GO:0051707~response to other organism	63	S100A8, PTGS2, TLR4, HP, IGHM, CXCL11, TLR8, CXCL10, NLRC5, BAK1, SLC1A3, CLEC4E, OASL2, IFNG, GBP10, LTF, NOS2, TNIP3, GBP7, BATF2, BST2, CAMP, ELANE, CD160, NLRP3, C1QBP, MB21D1, SLPI, AICDA, OAS1G, GBP3, GBP2, PTAFR, CTSG, IFIH1, TNF, CXCL9, GNG12, GBP2B, MIF, IL12RB2, IL12RB1, SERPINB10, IIGP1, ZBP1, LYZ1, IRGM2, IL23R, CEBPE, FCGR4, SLAMF8, STAT1, FCGR1, ANXA3, LGALS9, PLAC8, SOD2, LCN2, IFI…	4.936E-22
GO:0034097~response to cytokine	52	PODNL1, PTGS2, AIF1, SERPINA3F, CXCL11, CXCL10, NLRC5, GM4841, IFNG, GBP10, NOS2, IL1A, GBP8, GBP7, GBP5, BST2, SOCS3, CAMP, SOCS1, SAA3, CCR2, UBD, GBP4, GBP3, GBP2, TNF, CSF2RB2, CXCL9, CCL8, GM5431, GBP2B, CCL4, CCL6, IL12RB2, IL12RB1, IGTP, CHIL1, IIGP1, ZBP1, IRGM1, IRGM2, IL23R, IL1RN, STAT1, LCN2, IFIT1, PARP9, F830016B08RIK, CD274, IRF1, GM4951, IFI205	4.99E-22
GO:0006954~inflammatory response	49	S100A8, PTGS2, AIF1, S100A9, HP, TLR4, CXCL11, TLR8, CXCL10, CASP4, AOAH, NOS2, IL1A, GBP5, SOCS3, ELANE, SAA3, NLRP3, CCR5, C1QBP, CCR2, PLA2G7, PTAFR, SIGLECE, TNF, C6, FPR1, CXCL9, CCL8, FPR2, CCL4, ADA, CCL6, MIF, CHIL1, CHIL3, ALOX5AP, TGM2, IL23R, IL1RN, SLAMF8, CD5L, FCGR1, LGALS9, FCGR3, GPR33, PLA2G4A, CYBB, CLEC7A	2.64E-21
GO:0098542~defense response to other organism	47	IFIH1, TNF, CXCL9, TLR4, HP, GBP2B, IGHM, TLR8, CXCL10, NLRC5, IL12RB1, SLC1A3, CLEC4E, OASL2, IFNG, SERPINB10, GBP10, LTF, IIGP1, NOS2, ZBP1, GBP7, LYZ1, BATF2, IL23R, IRGM2, CEBPE, BST2, CAMP, ELANE, CD160, SLAMF8, NLRP3, FCGR1, ANXA3, LGALS9, PLAC8, IFIT1, C1QBP, MB21D1, IRF1, MPO, SLPI, OAS1G, GBP3, GBP2, CTSG	1.53E-19
GO:0050778~positive regulation of immune response	39	IFIH1, TNF, C6, FPR1, TLR4, FPR2, IGHM, C1QC, ADA, TLR8, MIF, NLRC5, IL12RB1, SH2D1B1, IFNG, LTF, LAG3, ZBP1, TNIP3, IL23R, GBP5, LGALS3, CFB, ELANE, IL21, NLRP3, FCGR1, LGALS9, FCGR3, GPR33, C1QA, C1QB, C1QBP, MB21D1, CCR2, IRF1, CLEC7A, PTAFR, CTSG	6.82E-17
GO:0034341~response to interferon-gamma	22	GBP8, GBP7, IRGM2, GBP5, IL23R, BST2, AIF1, SOCS1, CCL8, STAT1, GBP2B, CCL4, CCL6, NLRC5, IL12RB1, GBP10, IRF1, UBD, NOS2, GBP4, GBP3, GBP2	9.12E-17
GO:0031349~positive regulation of defense response	31	IFIH1, TNF, PTGS2, S100A8, S100A9, CCL8, TLR4, CCL4, TLR8, CCL6, MIF, NLRC5, SH2D1B1, ALOX5AP, TGM2, LTF, LAG3, TNIP3, ZBP1, GBP5, IL21, FCGR1, LGALS9, FCGR3, PLA2G4A, CCR5, C1QBP, MB21D1, CCR2, IRF1, CLEC7A	1.25E-16
GO:0050727~regulation of inflammatory response	28	SIGLECE, TNF, PTGS2, S100A8, C6, S100A9, CCL8, TLR4, CCL4, ADA, CCL6, MIF, CASP4, AOAH, ALOX5AP, TGM2, NOS2, GBP5, SOCS3, SLAMF8, NLRP3, FCGR1, LGALS9, FCGR3, PLA2G4A, CCR5, C1QBP, CCR2	2.10E-13
GO:0032496~response to lipopolysaccharide	32	TNF, PTGS2, S100A8, CXCL9, TLR4, GNG12, CXCL11, CXCL10, MIF, IL12RB2, IFNG, GBP10, LTF, NOS2, TNIP3, IL23R, CEBPE, CAMP, ELANE, FCGR4, NLRP3, STAT1, LGALS9, SOD2, LCN2, MPO, SLPI, AICDA, GBP2, MGST1, CTSG, PTAFR	3.30E-13
GO:0042742~defense response to bacterium	28	TNF, HP, TLR4, GBP2B, IGHM, CLEC4E, IFNG, GBP10, IIGP1, LTF, NOS2, GBP7, IRGM2, LYZ1, CEBPE, CAMP, ELANE, CD160, SLAMF8, FCGR1, LGALS9, ANXA3, PLAC8, SLPI, MPO, GBP3, GBP2, CTSG	6.06E-13
GO:0050900~leukocyte migration	28	TNF, S100A8, AIF1, S100A9, CXCL9, FPR1, CCL8, RETNLG, FPR2, CXCL11, CCL4, ADA, CCL6, CXCL10, IFNG, IL1A, LGALS3, ELANE, SLAMF8, LGALS9, FCGR3, GPR33, C1QBP, CCR2, RIPK3, PLA2G7, PTAFR, ITGA2B	6.77E-13
GO:0002237~response to molecule of bacterial origin	32	TNF, PTGS2, S100A8, CXCL9, TLR4, GNG12, CXCL11, CXCL10, MIF, IL12RB2, IFNG, GBP10, LTF, NOS2, TNIP3, IL23R, CEBPE, CAMP, ELANE, FCGR4, NLRP3, STAT1, LGALS9, SOD2, LCN2, MPO, SLPI, AICDA, GBP2, MGST1, CTSG, PTAFR	6.69E-13
GO:0001819~positive regulation of cytokine production	30	IFIH1, TNF, PTGS2, TNFSF15, TLR4, CCL4, TLR8, MIF, IL12RB2, IL12RB1, CASP4, CLEC4E, HPSE, IFNG, IL1A, GBP5, IL23R, ELANE, NLRP3, IL21, LGALS9, FCGR3, CYBB, CCR5, C1QBP, CCR2, CD274, IRF1, CLEC5A, PTAFR	1.67E-12
GO:0045088~regulation of innate immune response	22	IFIH1, GBP5, TNF, SOCS1, TLR4, SLAMF8, IL21, LGALS9, TLR8, NLRC5, SH2D1B1, PARP9, C1QBP, MB21D1, TAP1, IRF1, LTF, TRAFD1, CLEC7A, LAG3, TNIP3, ZBP1	1.51E-10
GO:0032103~positive regulation of response to external stimulus	24	GBP5, TNF, S100A8, PTGS2, AIF1, S100A9, CXCL9, CCL8, TLR4, CXCL11, CCL4, FCGR1, LGALS9, MIF, CCL6, FCGR3, CXCL10, PLA2G4A, CCR5, C1QBP, ALOX5AP, CCR2, TGM2, PLA2G7	1.555E-10
GO:0050729~positive regulation of inflammatory response	17	TNF, GBP5, S100A8, PTGS2, S100A9, CCL8, TLR4, CCL4, FCGR1, MIF, CCL6, FCGR3, PLA2G4A, CCR5, ALOX5AP, CCR2, TGM2	1.61E-10
GO:0071310~cellular response to organic substance	68	GDF3, MSR1, PODNL1, PTGS2, AIF1, TLR4, CXCL11, CXCL10, NLRC5, BAK1, CASP4, GM4841, IFNG, GBP10, LTF, PDGFC, NOS2, IL1A, TNIP3, GBP8, GBP7, GBP5, SOCS3, CAMP, SOCS1, SAA3, NLRP3, MB21D1, CCR2, AICDA, GBP4, GBP3, GBP2, PTAFR, XDH, TNF, CSF2RB2, CXCL9, CCL8, GM5431, GBP2B, CCL4, MIF, CCL6, IGTP, IL12RB1, CHIL1, IIGP1, PRKAA2, MYOF, ZBP1, IRGM1, IRGM2, IL23R, CEBPE, IL1RN, FCGR4, STAT1, SOD2, LCN2, C…	2.87E-10
GO:0002460~adaptive immune response based on somatic recombination of immune receptors built from immunoglobulin superfamily domains	23	TNF, IL23R, GZMB, NLRP3, IGHM, FCGR1, C1QC, LGALS9, ADA, FCGR3, C1QA, C1QB, IL18BP, IL12RB1, C1QBP, CCR2, IFNG, GADD45G, RIPK3, IRF1, CTSC, AICDA, RAB27A	1.24E-9
GO:0042107~cytokine metabolic process	16	TNF, CEBPE, ELANE, TNFSF15, TLR4, IL21, TLR8, FCGR3, CYBB, GADD45G, IFNG, CCR2, IRF1, LAG3, IL1A, PTAFR	1.81E-9
GO:0060326~cell chemotaxis	22	S100A8, LGALS3, AIF1, S100A9, SAA3, FPR1, CXCL9, CCL8, SLAMF8, RETNLG, FPR2, CXCL11, CCL4, LGALS9, CCL6, CXCL10, FCGR3, GPR33, C1QBP, CCR2, IFNG, PLA2G7	3.47E-9
GO:0042089~cytokine biosynthetic process	15	TNF, CEBPE, ELANE, TLR4, IL21, TLR8, FCGR3, CYBB, GADD45G, IFNG, CCR2, IRF1, LAG3, IL1A, PTAFR	1.22E-8
GO:0016477~cell migration	46	TNF, PTGS2, SHTN1, S100A8, AIF1, S100A9, CXCL9, FPR1, CCL8, RETNLG, FPR2, CXCL11, CCL4, ADA, CCL6, CXCL10, SDC3, MIF, GLIPR2, IFNG, PDILT, PDGFC, GPNMB, IL1A, PSTPIP2, LGALS3, BST2, PLXNB2, IL1RN, ELANE, SAA3, SLAMF8, SIRPA, ANXA3, LGALS9, FCGR3, GPR33, C1QBP, CCR5, CD274, CCR2, RIPK3, PLA2G7, PLAU, PTAFR, ITGA2B	1.21E-8
GO:0032609~interferon-gamma production	15	IL23R, TNF, TLR4, IL21, PDCD1LG2, LGALS9, TLR8, IL12RB2, IL12RB1, SH2D1B1, C1QBP, CCR2, GADD45G, CD274, RNF19B	1.27E-8
GO:0050663~cytokine secretion	18	TNF, GBP5, TNFSF15, TLR4, NLRP3, ANXA4, LGALS9, MIF, CASP4, CHIL1, CCR5, CLEC4E, CD274, IFNG, RNF19B, NOS2, CLEC5A, IL1A	1.56E-8
GO:0002253~activation of immune response	23	IFIH1, TNF, LGALS3, CFB, C6, FPR1, TLR4, FPR2, IGHM, C1QC, TLR8, ADA, LGALS9, C1QA, GPR33, C1QB, C1QBP, MB21D1, IFNG, IRF1, LTF, CLEC7A, TNIP3	1.57E-8
GO:0016032~viral process	31	IFIH1, TNF, CXCL9, GBP2B, CCL4, TLR8, CXCL10, NLRC5, SLC1A3, IL12RB1, OASL2, TAP1, IFNG, SERPINB10, LTF, ZBP1, IL23R, BST2, NLRP3, STAT1, LGALS9, LCN2, IFIT1, C1QBP, CCR5, MB21D1, IRF1, RIPK3, SLPI, GBP4, OAS1G	1.64E-8
GO:0002449~lymphocyte mediated immunity	21	TNF, GZMB, NLRP3, IGHM, IL21, FCGR1, C1QC, LGALS9, FCGR3, C1QA, C1QB, SH2D1B1, C1QBP, TAP1, IFNG, RIPK3, CTSC, AICDA, RNF19B, LAG3, RAB27A	1.72E-8
GO:0045321~leukocyte activation	36	PSMB10, LST1, AIF1, TLR4, IGHM, TLR8, ADA, MIF, BAK1, IL12RB1, CLEC4E, SH2D1B1, IFNG, IL15RA, GPNMB, LAG3, RAB27A, TYROBP, BATF2, LGALS3, FCGR4, NLRP3, IL21, LGALS9, PDCD1LG2, ANXA3, FCGR3, CCR2, GADD45G, CD274, RIPK3, IRF1, UBD, AICDA, CLEC7A, PTAFR	2.69E-8
GO:0042108~positive regulation of cytokine biosynthetic process	12	CYBB, TNF, ELANE, CCR2, IFNG, IRF1, TLR4, IL21, TLR8, PTAFR, IL1A, FCGR3	4.67E-8
GO:0033993~response to lipid	40	TNF, PTGS2, S100A8, AIF1, CXCL9, TLR4, GNG12, CXCL11, CXCL10, MIF, IL12RB2, IFNG, GBP10, LTF, NOS2, TNIP3, IL23R, TBXAS1, CEBPE, CAMP, IL1RN, ELANE, FCGR4, NLRP3, STAT1, FCGR1, ANXA3, LGALS9, SOD2, LCN2, CYBB, CCR5, MPO, SLPI, AICDA, RIDA, GBP2, PTAFR, MGST1, CTSG	4.83E-8
GO:0032649~regulation of interferon-gamma production	14	TNF, IL23R, TLR4, IL21, PDCD1LG2, LGALS9, TLR8, IL12RB2, IL12RB1, C1QBP, SH2D1B1, CD274, CCR2, RIPK3	5.46E-8
GO:0045089~positive regulation of innate immune response	17	IFIH1, TNF, GBP5, TLR4, IL21, LGALS9, TLR8, NLRC5, SH2D1B1, C1QBP, MB21D1, IRF1, LTF, CLEC7A, LAG3, TNIP3, ZBP1	6.05E-8
GO:0009615~response to virus	23	IFIH1, TNF, IL23R, BST2, CXCL9, GBP2B, NLRP3, LGALS9, TLR8, CXCL10, LCN2, NLRC5, IFIT1, SLC1A3, IL12RB1, C1QBP, MB21D1, OASL2, IFNG, IRF1, SERPINB10, OAS1G, ZBP1	1.72E-7
GO:0042832~defense response to protozoan	9	GBP7, IRGM2, BATF2, IFNG, GBP10, IIGP1, GBP2B, GBP3, GBP2	1.85E-7
GO:0050707~regulation of cytokine secretion	16	TNF, CASP4, CCR5, CLEC4E, IFNG, SOCS1, CD274, TNFSF15, TLR4, NLRP3, CLEC5A, ANXA4, TLR8, LGALS9, IL1A, MIF	1.98E-7
GO:0035556~intracellular signal transduction	66	GDF3, PODNL1, SHTN1, S100A8, PTGS2, AIF1, S100A9, TNFSF15, TLR4, IGHM, CXCL11, RHOU, TLR8, CXCL10, BAK1, ARL11, CASP4, HPSE, IFNG, IL15RA, LTF, PDGFC, NOS2, RAB27B, IL1A, TNIP3, RAB27A, F10, BST2, SOCS3, SOCS1, SAA3, NLRP3, IL21, CCR5, C1QBP, GADD45G, RIPK3, UBD, PTAFR, XDH, IFIH1, OLFM4, TNF, CYSLTR2, CXCL9, CCL8, CCL4, ADA, MIF, CCL6, GLIPR2, CHIL1, TGM2, PRKAA2, GPNMB, IL23R, IL1RN, VDAC2, STA…	2.34E-7
GO:0030335~positive regulation of cell migration	25	SHTN1, PTGS2, AIF1, CXCL9, CXCL11, CCL4, MIF, CXCL10, GLIPR2, IFNG, PDGFC, GPNMB, IL1A, LGALS3, ELANE, ANXA3, LGALS9, C1QBP, CCR5, CD274, CCR2, PLA2G7, PLAU, PTAFR, ITGA2B	2.86E-7
GO:0048870~cell motility	46	TNF, PTGS2, SHTN1, S100A8, AIF1, S100A9, CXCL9, FPR1, CCL8, RETNLG, FPR2, CXCL11, CCL4, ADA, CCL6, CXCL10, SDC3, MIF, GLIPR2, IFNG, PDILT, PDGFC, GPNMB, IL1A, PSTPIP2, LGALS3, BST2, PLXNB2, IL1RN, ELANE, SAA3, SLAMF8, SIRPA, ANXA3, LGALS9, FCGR3, GPR33, C1QBP, CCR5, CD274, CCR2, RIPK3, PLA2G7, PLAU, PTAFR, ITGA2B	2.91E-7
GO:0042035~regulation of cytokine biosynthetic process	13	TNF, ELANE, TLR4, IL21, TLR8, FCGR3, CYBB, IFNG, CCR2, IRF1, LAG3, IL1A, PTAFR	4.42E-7
GO:1902533~positive regulation of intracellular signal transduction	36	XDH, TNF, PTGS2, S100A8, CYSLTR2, S100A9, CXCL9, TNFSF15, CCL8, TLR4, CXCL11, IGHM, CCL4, ADA, CCL6, CXCL10, MIF, GLIPR2, CHIL1, HPSE, IFNG, TGM2, LTF, PDGFC, GPNMB, IL1A, F10, BST2, IL1RN, SOCS1, IL21, TNFSF10, C1QBP, GADD45G, RIPK3, UBD	4.72E-7
GO:2000147~positive regulation of cell motility	25	SHTN1, PTGS2, AIF1, CXCL9, CXCL11, CCL4, MIF, CXCL10, GLIPR2, IFNG, PDGFC, GPNMB, IL1A, LGALS3, ELANE, ANXA3, LGALS9, C1QBP, CCR5, CD274, CCR2, PLA2G7, PLAU, PTAFR, ITGA2B	4.93E-7
GO:0030334~regulation of cell migration	32	PTGS2, SHTN1, AIF1, CXCL9, CXCL11, CCL4, ADA, SDC3, CXCL10, MIF, GLIPR2, IFNG, PDGFC, GPNMB, IL1A, LGALS3, BST2, PLXNB2, IL1RN, ELANE, SLAMF8, LGALS9, ANXA3, CCR5, C1QBP, CCR2, CD274, PLA2G7, RIPK3, PTAFR, PLAU, ITGA2B	5.91E-7
GO:0002687~positive regulation of leukocyte migration	14	LGALS3, AIF1, ELANE, CXCL9, CXCL11, CCL4, LGALS9, CXCL10, C1QBP, CCR2, PLA2G7, IL1A, PTAFR, ITGA2B	7.14E-7
GO:0051272~positive regulation of cellular component movement	25	SHTN1, PTGS2, AIF1, CXCL9, CXCL11, CCL4, MIF, CXCL10, GLIPR2, IFNG, PDGFC, GPNMB, IL1A, LGALS3, ELANE, ANXA3, LGALS9, C1QBP, CCR5, CD274, CCR2, PLA2G7, PLAU, PTAFR, ITGA2B	7.24E-7
GO:0051607~defense response to virus	20	IFIH1, IL23R, BST2, CXCL9, GBP2B, NLRP3, TLR8, CXCL10, NLRC5, IFIT1, SLC1A3, IL12RB1, C1QBP, MB21D1, OASL2, IFNG, IRF1, SERPINB10, OAS1G, ZBP1	7.79E-7
GO:0006909~phagocytosis	16	SIGLECE, TNF, CEBPE, AIF1, PRTN3, ELANE, IGHM, SIRPA, FCGR1, ANXA3, FCGR3, CCR2, TGM2, CLEC7A, CD302, RAB27A	8.05E-7
GO:0001818~negative regulation of cytokine production	17	IL23R, TNF, BST2, ELANE, TLR4, NLRP3, ANXA4, PDCD1LG2, LGALS9, SH2D1B1, C1QBP, CD274, IFNG, LTF, GBP4, GPNMB, LAG3	9.16E-7
GO:0009967~positive regulation of signal transduction	44	XDH, GDF3, TNF, PTGS2, S100A8, CYSLTR2, S100A9, CXCL9, TNFSF15, CCL8, TLR4, CXCL11, IGHM, CCL4, ADA, CCL6, CXCL10, MIF, GLIPR2, BAK1, NLRC5, CHIL1, SH2D1B1, HPSE, IFNG, TGM2, LTF, PDGFC, GPNMB, IL1A, ZBP1, F10, BST2, IL1RN, SOCS1, IL21, LGALS9, TNFSF10, ATF3, C1QBP, GADD45G, RIPK3, UBD, CTSC	1.30E-6
GO:0051247~positive regulation of protein metabolic process	46	XDH, GDF3, TNF, S100A8, CYSLTR2, AIF1, C6, S100A9, TNFSF15, CCL8, GSAP, TLR4, IGHM, CCL4, TLR8, CCL6, MIF, GLIPR2, BAK1, CHIL1, SH2D1B1, IFNG, LTF, PDGFC, GPNMB, IL1A, CAMP, IL1RN, ELANE, SOCS1, IL21, NLRP3, STAT1, LGALS9, FCGR3, CYBB, TNFSF10, C1QBP, CASP12, GADD45G, CCR2, RIPK3, IRF1, CTSC, RNF19B, PTAFR	1.29E-6
GO:0070663~regulation of leukocyte proliferation	17	LST1, LGALS3, AIF1, TLR4, IGHM, IL21, PDCD1LG2, LGALS9, ADA, MIF, IL12RB1, CCR2, IFNG, CD274, IRF1, RIPK3, GPNMB	1.36E-6
GO:0002764~immune response-regulating signaling pathway	19	IFIH1, TNF, LGALS3, FPR1, TLR4, FPR2, IGHM, LGALS9, ADA, TLR8, GPR33, SH2D1B1, CLEC4E, C1QBP, IFNG, IRF1, LTF, CLEC7A, TNIP3	1.56E-6
GO:2000145~regulation of cell motility	32	PTGS2, SHTN1, AIF1, CXCL9, CXCL11, CCL4, ADA, SDC3, CXCL10, MIF, GLIPR2, IFNG, PDGFC, GPNMB, IL1A, LGALS3, BST2, PLXNB2, IL1RN, ELANE, SLAMF8, LGALS9, ANXA3, CCR5, C1QBP, CCR2, CD274, PLA2G7, RIPK3, PTAFR, PLAU, ITGA2B	1.60E-6
GO:0006935~chemotaxis	26	S100A8, AIF1, S100A9, CXCL9, FPR1, CCL8, RETNLG, FPR2, CXCL11, CCL4, CCL6, CXCL10, IFNG, TUBB3, LGALS3, PLXNB2, SAA3, SLAMF8, LGALS9, FCGR3, GPR33, C1QBP, CCR5, CCR2, PLA2G7, PTAFR	1.63E-6
GO:1902531~regulation of intracellular signal transduction	48	XDH, GDF3, OLFM4, PODNL1, TNF, PTGS2, S100A8, CYSLTR2, S100A9, CXCL9, TNFSF15, CCL8, TLR4, CXCL11, IGHM, CCL4, ADA, CCL6, CXCL10, MIF, GLIPR2, CHIL1, HPSE, IFNG, TGM2, LTF, PDGFC, PRKAA2, GPNMB, IL1A, TNIP3, F10, BST2, SOCS3, IL1RN, SOCS1, VDAC2, STAT1, NLRP3, IL21, SOD2, TNFSF10, ATF3, C1QBP, GADD45G, RIPK3, IRF1, UBD	1.85E-6
GO:0007159~leukocyte cell-cell adhesion	25	PSMB10, TNF, S100A8, AIF1, S100A9, ADA, IL12RB1, CLEC4E, IFNG, GPNMB, LAG3, RAB27A, LGALS3, ELANE, FCGR4, NLRP3, IL21, LGALS9, PDCD1LG2, CCR2, GADD45G, CD274, IRF1, RIPK3, PTAFR	2.42E-6
GO:0046651~lymphocyte proliferation	19	PSMB10, LST1, LGALS3, AIF1, FCGR4, TLR4, IGHM, IL21, PDCD1LG2, LGALS9, ADA, MIF, IL12RB1, CCR2, IFNG, CD274, IRF1, RIPK3, GPNMB	3.10E-6
GO:0032943~mononuclear cell proliferation	19	PSMB10, LST1, LGALS3, AIF1, FCGR4, TLR4, IGHM, IL21, PDCD1LG2, LGALS9, ADA, MIF, IL12RB1, CCR2, IFNG, CD274, IRF1, RIPK3, GPNMB	3.34E-6
GO:0010647~positive regulation of cell communication	46	XDH, GDF3, TNF, PTGS2, S100A8, CYSLTR2, S100A9, CXCL9, TNFSF15, CCL8, TLR4, CXCL11, IGHM, CCL4, ADA, CCL6, CXCL10, MIF, GLIPR2, BAK1, NLRC5, SLC1A3, CHIL1, SH2D1B1, HPSE, IFNG, TGM2, LTF, PDGFC, GPNMB, HCAR2, IL1A, ZBP1, F10, BST2, IL1RN, SOCS1, IL21, LGALS9, TNFSF10, ATF3, C1QBP, GADD45G, RIPK3, UBD, CTSC	3.80E-6
GO:0002366~leukocyte activation involved in immune response	17	LGALS3, TLR4, NLRP3, LGALS9, ANXA3, ADA, SH2D1B1, CLEC4E, CCR2, IFNG, GADD45G, IRF1, AICDA, CLEC7A, PTAFR, TYROBP, RAB27A	4.34E-6
GO:0002263~cell activation involved in immune response	17	LGALS3, TLR4, NLRP3, LGALS9, ANXA3, ADA, SH2D1B1, CLEC4E, CCR2, IFNG, GADD45G, IRF1, AICDA, CLEC7A, PTAFR, TYROBP, RAB27A	4.77E-6
GO:0071219~cellular response to molecule of bacterial origin	17	TNF, CEBPE, CAMP, FCGR4, TLR4, STAT1, NLRP3, MIF, CXCL10, LCN2, IFNG, GBP10, LTF, AICDA, NOS2, GBP2, TNIP3	4.96E-6
GO:0002703~regulation of leukocyte mediated immunity	15	TNF, BST2, TLR4, IL21, NLRP3, FCGR1, LGALS9, FCGR3, SH2D1B1, TAP1, IFNG, CCR2, RIPK3, LAG3, PTAFR	5.20E-6
GO:0010942~positive regulation of cell death	27	XDH, TNF, PTGS2, S100A8, CYSLTR2, C6, S100A9, TNFSF15, TLR4, HP, BAK1, IFNG, TGM2, HCAR2, NLRP3, STAT1, PLA2G4A, TNFSF10, ATF3, CCR5, C1QBP, GADD45G, CASP12, IRF1, RIPK3, UBD, CTSC	5.98E-6
GO:0050715~positive regulation of cytokine secretion	12	CASP4, TNF, CLEC4E, CCR5, CD274, IFNG, TNFSF15, NLRP3, CLEC5A, LGALS9, IL1A, MIF	7.44E-6
GO:1901342~regulation of vasculature development	17	XDH, PTGS2, NGP, LGALS3, CYSLTR2, CAMP, C6, STAT1, ANXA3, CXCL10, WARS, CYBB, CHIL1, CCR5, CCR2, IFNG, IL1A	9.41E-6
GO:0012501~programmed cell death	52	GDF3, S100A8, PTGS2, AIF1, LGMN, S100A9, TNFSF15, PRDX5, TLR4, BAK1, CASP4, CASP7, IFNG, LTF, MLKL, HCAR2, IL1A, SOCS3, GZMB, NLRP3, IL21, CCR5, C1QBP, GADD45G, RIPK3, UBD, CTSC, CLEC5A, XDH, TNF, C6, ACP2, ADA, MIF, CHIL1, HK3, TGM2, PRKAA2, LGALS3, IL1RN, CD5L, STAT1, VDAC2, PLAC8, SOD2, LCN2, TNFSF10, PLA2G4A, ATF3, CASP12, IRF1, DRAM1	1.01E-5
GO:1903037~regulation of leukocyte cell-cell adhesion	18	TNF, LGALS3, AIF1, ELANE, NLRP3, IL21, PDCD1LG2, LGALS9, ADA, IL12RB1, CCR2, IFNG, CD274, IRF1, RIPK3, GPNMB, LAG3, PTAFR	1.11E-5
GO:0002548~monocyte chemotaxis	9	LGALS3, AIF1, CCR2, PLA2G7, CCL8, SLAMF8, CCL4, CCL6, CXCL10	1.97E-5
GO:0022407~regulation of cell-cell adhesion	20	TNF, LGALS3, AIF1, IL1RN, ELANE, NLRP3, IL21, PDCD1LG2, LGALS9, ADA, IL12RB1, CCR5, CCR2, IFNG, CD274, IRF1, RIPK3, GPNMB, LAG3, PTAFR	1.95E-5
GO:1903555~regulation of tumor necrosis factor superfamily cytokine production	12	CYBB, CCR5, CCR2, CD274, IFNG, LTF, TLR4, GPNMB, CCL4, PTAFR, LGALS9, FCGR3	2.25E-5
GO:1903039~positive regulation of leukocyte cell-cell adhesion	14	TNF, AIF1, ELANE, NLRP3, IL21, PDCD1LG2, LGALS9, ADA, IL12RB1, CCR2, CD274, IFNG, IRF1, PTAFR	2.28E-5
GO:0022409~positive regulation of cell-cell adhesion	15	TNF, AIF1, ELANE, NLRP3, IL21, PDCD1LG2, LGALS9, ADA, IL12RB1, CCR5, CCR2, CD274, IFNG, IRF1, PTAFR	2.33E-5
GO:0002699~positive regulation of immune effector process	14	TNF, C6, TLR4, IL21, NLRP3, FCGR1, MIF, FCGR3, SH2D1B1, IFNG, CCR2, IRF1, LAG3, PTAFR	2.519E-5
GO:0050777~negative regulation of immune response	12	NLRC5, OLFM4, TNF, SH2D1B1, LGALS3, BST2, TAP1, CCR2, IRF1, SLAMF8, TRAFD1, LGALS9	2.49E-5
GO:0071706~tumor necrosis factor superfamily cytokine production	12	CYBB, CCR5, CCR2, CD274, IFNG, LTF, TLR4, GPNMB, CCL4, PTAFR, LGALS9, FCGR3	2.49E-5
GO:0002821~positive regulation of adaptive immune response	11	IL12RB1, IL23R, TNF, CCR2, IFNG, IRF1, NLRP3, FCGR1, ADA, MIF, FCGR3	2.49E-5
GO:0006508~proteolysis	45	XDH, PSMB10, TNF, S100A8, CNDP2, PRTN3, LGMN, C6, MMP8, S100A9, TNFSF15, SERPINA3F, HP, ANPEP, BAK1, CASP4, CASP7, IFNG, SERPINB10, LTF, PRSS34, F10, NGP, CFB, ELANE, MMP19, GZMB, MCPT8, NLRP3, STAT1, PSMB9, LAP3, GZMK, TNFSF10, PSME1, C1QBP, CST7, CASP12, SLPI, UBD, CTSC, RNF19B, PLAU, GCA, CTSG	2.53E-5
GO:0002819~regulation of adaptive immune response	13	IL12RB1, IL23R, TNF, CCR2, IFNG, RIPK3, IRF1, NLRP3, FCGR1, ADA, LGALS9, MIF, FCGR3	2.72E-5
GO:0051050~positive regulation of transport	34	TNF, PTGS2, S100A8, S100A9, CXCL9, TNFSF15, TLR4, CXCL11, IGHM, RHOU, CCL4, CXCL10, MIF, BAK1, CASP4, CLEC4E, IFNG, RAB27B, HCAR2, IL1A, ACSL5, RAB27A, LGALS3, NLRP3, FCGR1, SIRPA, LGALS9, FCGR3, SYNE1, PLA2G4A, CCR5, CD274, CLEC5A, PTAFR	2.89E-5
GO:0051246~regulation of protein metabolic process	61	GDF3, PODNL1, S100A8, AIF1, S100A9, TNFSF15, SERPINA3F, TLR4, IGHM, TLR8, BAK1, SH2D1B1, IFNG, LTF, PDGFC, NOS2, IL1A, LAG3, NGP, SOCS3, PLXNB2, CAMP, ELANE, SOCS1, NLRP3, IL21, C1QBP, PSME1, CST7, GADD45G, CCR2, RIPK3, SLPI, CTSC, GBP4, PTAFR, XDH, TNF, CYSLTR2, C6, CCL8, GSAP, CCL4, MIF, CCL6, GLIPR2, CHIL1, SERPINB10, GPNMB, IL1RN, STAT1, LGALS9, FCGR3, PSMB9, CYBB, TNFSF10, ATF3, CASP12, IRF1…	3.82E-5
GO:0016337~single organismal cell-cell adhesion	28	PSMB10, TNF, S100A8, AIF1, S100A9, ADA, IL12RB1, CLEC4E, IFNG, GPNMB, LAG3, RAB27A, LGALS3, IL1RN, ELANE, FCGR4, NLRP3, IL21, LGALS9, PDCD1LG2, CCR5, CCR2, GADD45G, CD274, RIPK3, IRF1, PTAFR, ITGA2B	3.88E-5
GO:0046903~secretion	35	XDH, TNF, S100A8, S100A9, TNFSF15, TLR4, ANPEP, TLR8, ADA, MIF, CASP4, CLEC4E, CHIL1, IFNG, NOS2, RAB27B, HCAR2, IL1A, RAB27A, GBP5, LGALS3, IL1RN, SOCS1, NLRP3, ANXA4, ANXA3, LGALS9, FCGR3, PLA2G4A, CCR5, CCR2, CD274, RNF19B, CLEC5A, PTAFR	4.44E-5
GO:0051046~regulation of secretion	28	TNF, S100A8, S100A9, TNFSF15, TLR4, ANPEP, TLR8, ADA, MIF, CASP4, CLEC4E, IFNG, NOS2, RAB27B, HCAR2, IL1A, RAB27A, LGALS3, IL1RN, SOCS1, NLRP3, ANXA4, LGALS9, CCR5, CCR2, CD274, CLEC5A, PTAFR	5.32E-5
GO:0007166~cell surface receptor signaling pathway	57	GDF3, PODNL1, SHTN1, LGMN, TLR4, HP, IGHM, CXCL11, CXCL10, NLRC5, BAK1, CLEC4E, SH2D1B1, IFNG, LTF, PDGFC, IL1A, LAG3, ADGRE1, SOCS3, PLXNB2, SOCS1, GZMB, CCR2, ITGA2B, CLEC1B, XDH, TNF, CSF2RB2, CXCL9, FPR1, CCL8, FPR2, CCL4, ADA, MIF, CCL6, IIGP1, PRKAA2, ZBP1, TYROBP, IL23R, LGALS3, IL1RN, ADGRG7, STAT1, FCGR1, ANXA4, LGALS9, FCGR3, LCN2, GPR33, TNFSF10, ATF3, CD274, IRF1, CLEC7A	5.33E-5
GO:0051249~regulation of lymphocyte activation	20	LST1, LGALS3, AIF1, TLR4, NLRP3, IGHM, IL21, PDCD1LG2, LGALS9, ADA, MIF, IL12RB1, CCR2, IFNG, CD274, IRF1, RIPK3, IL15RA, GPNMB, LAG3	5.33E-5
GO:2000377~regulation of reactive oxygen species metabolic process	13	XDH, TNF, PTGS2, AIF1, HP, TLR4, SOD2, GLA, IFNG, RIPK3, PLAU, PON3, RAB27A	5.37E-5
GO:0045765~regulation of angiogenesis	15	PTGS2, NGP, LGALS3, CYSLTR2, CAMP, C6, STAT1, ANXA3, CXCL10, WARS, CYBB, CCR5, CHIL1, CCR2, IL1A	5.95E-5
GO:0043068~positive regulation of programmed cell death	24	XDH, TNF, S100A8, PTGS2, C6, S100A9, TNFSF15, TLR4, STAT1, NLRP3, BAK1, PLA2G4A, TNFSF10, ATF3, CCR5, C1QBP, GADD45G, CASP12, IFNG, TGM2, RIPK3, UBD, CTSC, HCAR2	6.14E-5
GO:0031325~positive regulation of cellular metabolic process	65	GDF3, NAMPT, S100A8, PTGS2, AIF1, S100A9, TNFSF15, TLR4, IGHM, CXCL11, TLR8, CXCL10, NLRC5, BAK1, SH2D1B1, IFNG, LTF, PDGFC, NOS2, SPIC, IL1A, RAB27A, CAMP, ELANE, SOCS1, NLRP3, IL21, C1QBP, GADD45G, CCR2, RIPK3, AICDA, CTSC, PTAFR, XDH, TNF, CYSLTR2, C6, CXCL9, CCL8, GSAP, CCL4, MIF, CCL6, GLIPR2, CHIL1, PRKAA2, GPNMB, ACSL5, CEBPE, IL1RN, STAT1, ANXA3, LGALS9, PLAC8, SOD2, FCGR3, CYBB, TNFSF10,…	6.33E-5
GO:0097530~granulocyte migration	11	S100A8, LGALS3, C1QBP, S100A9, IFNG, CCL8, SLAMF8, CCL4, IL1A, CCL6, FCGR3	7.90E-5
GO:2000379~positive regulation of reactive oxygen species metabolic process	10	XDH, TNF, PTGS2, AIF1, IFNG, RIPK3, TLR4, PLAU, SOD2, RAB27A	8.14E-5
GO:1903409~reactive oxygen species biosynthetic process	10	CYBB, TNF, PTGS2, GLA, AIF1, IFNG, TLR4, NOS2, SOD2, RAB27A	8.14E-5
GO:0009306~protein secretion	22	GBP5, TNF, IL1RN, SOCS1, TNFSF15, TLR4, NLRP3, ANXA4, LGALS9, TLR8, MIF, CASP4, CHIL1, CCR5, CLEC4E, IFNG, CD274, RNF19B, NOS2, CLEC5A, HCAR2, IL1A	9.41E-5
GO:0044146~negative regulation of growth of symbiont involved in interaction with host	6	TNF, CAMP, ELANE, IFNG, MPO, CTSG	9.49E-5
GO:0044130~negative regulation of growth of symbiont in host	6	TNF, CAMP, ELANE, IFNG, MPO, CTSG	9.49E-5
GO:0032270~positive regulation of cellular protein metabolic process	39	XDH, GDF3, TNF, S100A8, CYSLTR2, AIF1, C6, S100A9, TNFSF15, CCL8, TLR4, IGHM, CCL4, CCL6, MIF, GLIPR2, BAK1, CHIL1, SH2D1B1, IFNG, LTF, PDGFC, GPNMB, IL1A, CAMP, IL1RN, SOCS1, NLRP3, IL21, STAT1, LGALS9, TNFSF10, C1QBP, CASP12, GADD45G, RIPK3, CTSC, RNF19B, PTAFR	1.078E-4
GO:1903557~positive regulation of tumor necrosis factor superfamily cytokine production	9	CYBB, CCR5, CCR2, IFNG, TLR4, CCL4, PTAFR, LGALS9, FCGR3	1.08E-4
GO:0044765~single-organism transport	70	MSR1, S100A8, PTGS2, AIF1, S100A9, TNFSF15, TLR4, ANPEP, IGHM, CXCL11, TLR8, CXCL10, BAK1, SLC1A3, CASP4, CLEC4E, IFNG, LTF, NOS2, RAB27B, HCAR2, IL1A, RAB27A, GBP5, ELANE, SOCS1, NLRP3, SIRPA, CCR5, CCR2, GBP4, CLEC5A, PTAFR, XDH, SIGLECE, RTP4, TNF, PRTN3, CXCL9, SFXN1, CCL4, ADA, MIF, CHIL1, TAP1, TGM2, SLC31A1, ABCA13, ACSL5, APOL11B, SOAT2, CEBPE, LGALS3, IL1RN, VDAC2, ANXA4, FCGR1, ANXA3, L…	1.10E-4
GO:0002694~regulation of leukocyte activation	21	LST1, LGALS3, AIF1, TLR4, NLRP3, IGHM, IL21, PDCD1LG2, LGALS9, ADA, MIF, IL12RB1, CCR2, IFNG, CD274, RIPK3, IRF1, IL15RA, GPNMB, LAG3, PTAFR	1.10E-4
GO:0044126~regulation of growth of symbiont in host	6	TNF, CAMP, ELANE, IFNG, MPO, CTSG	1.17E-4
GO:0044364~disruption of cells of other organism	6	CCR5, CAMP, ELANE, IFNG, NOS2, CTSG	1.17E-4
GO:0031640~killing of cells of other organism	6	CCR5, CAMP, ELANE, IFNG, NOS2, CTSG	1.17E-4
GO:0044144~modulation of growth of symbiont involved in interaction with host	6	TNF, CAMP, ELANE, IFNG, MPO, CTSG	1.17E-4
GO:0009966~regulation of signal transduction	59	GDF3, PODNL1, PTGS2, S100A8, LGMN, S100A9, TNFSF15, TLR4, IGHM, CXCL11, CXCL10, NLRC5, BAK1, SH2D1B1, HPSE, IFNG, LTF, PDGFC, IL1A, TNIP3, F10, BST2, SOCS3, SOCS1, NLRP3, IL21, C1QBP, GADD45G, RIPK3, UBD, CTSC, XDH, OLFM4, TNF, CYSLTR2, CXCL9, CCL8, CCL4, ADA, MIF, CCL6, GLIPR2, CHIL1, TGM2, PRKAA2, GPNMB, MYOF, ZBP1, LGALS3, IL1RN, STAT1, VDAC2, LGALS9, SOD2, TNFSF10, ATF3, RGS1, IRF1, PLAU	1.17E-4
GO:0001525~angiogenesis	20	PTGS2, NGP, LGALS3, CYSLTR2, CAMP, C6, MMP19, ANPEP, STAT1, ANXA3, CXCL10, WARS, BAK1, CYBB, CHIL1, CCR5, HPSE, CCR2, IL1A, PLAU	1.32E-4
GO:0045785~positive regulation of cell adhesion	18	OLFM4, TNF, AIF1, ELANE, NLRP3, IL21, PDCD1LG2, LGALS9, ADA, IL12RB1, CCR5, C1QBP, CCR2, IFNG, CD274, TGM2, IRF1, PTAFR	1.39E-4
GO:0010562~positive regulation of phosphorus metabolic process	33	XDH, GDF3, TNF, AIF1, CYSLTR2, CXCL9, TNFSF15, CCL8, TLR4, CXCL11, IGHM, CCL4, CCL6, CXCL10, MIF, GLIPR2, CHIL1, SH2D1B1, IFNG, LTF, PDGFC, NOS2, PRKAA2, GPNMB, IL1A, CAMP, IL1RN, SOCS1, IL21, LGALS9, GADD45G, RIPK3, PTAFR	1.64E-4
GO:0002696~positive regulation of leukocyte activation	16	AIF1, TLR4, NLRP3, IGHM, IL21, PDCD1LG2, LGALS9, ADA, MIF, IL12RB1, CCR2, CD274, IFNG, IRF1, IL15RA, PTAFR	1.69E-4
GO:0031348~negative regulation of defense response	12	NLRC5, SIGLECE, SH2D1B1, C1QBP, SOCS3, AOAH, TAP1, SLAMF8, TRAFD1, NLRP3, ADA, LGALS9	1.68E-4
GO:0051251~positive regulation of lymphocyte activation	15	AIF1, TLR4, IGHM, IL21, NLRP3, PDCD1LG2, LGALS9, ADA, MIF, IL12RB1, CCR2, CD274, IFNG, IRF1, IL15RA	1.89E-4
GO:0042110~T cell activation	20	PSMB10, LGALS3, AIF1, FCGR4, NLRP3, IL21, PDCD1LG2, LGALS9, ADA, IL12RB1, CLEC4E, CCR2, IFNG, GADD45G, CD274, IRF1, RIPK3, GPNMB, LAG3, RAB27A	2.33E-4
GO:0002688~regulation of leukocyte chemotaxis	10	C1QBP, AIF1, CCR2, PLA2G7, CXCL9, SLAMF8, CXCL11, CCL4, LGALS9, CXCL10	2.34E-4
GO:0002698~negative regulation of immune effector process	10	TNF, SH2D1B1, LGALS3, BST2, C1QBP, TAP1, CCR2, IRF1, SLAMF8, LGALS9	2.34E-4
GO:0043067~regulation of programmed cell death	41	XDH, GDF3, TNF, PTGS2, S100A8, AIF1, LGMN, C6, S100A9, TNFSF15, PRDX5, TLR4, ADA, MIF, BAK1, CASP4, HK3, IFNG, TGM2, LTF, PRKAA2, HCAR2, LGALS3, SOCS3, IL1RN, VDAC2, NLRP3, STAT1, PLAC8, SOD2, TNFSF10, PLA2G4A, ATF3, CCR5, C1QBP, CASP12, GADD45G, RIPK3, UBD, CTSC, CLEC5A	2.38E-4
GO:0070665~positive regulation of leukocyte proliferation	11	IL12RB1, AIF1, CCR2, CD274, IFNG, TLR4, IL21, IGHM, ADA, PDCD1LG2, MIF	2.60E-4
GO:0051047~positive regulation of secretion	19	TNF, S100A8, LGALS3, S100A9, TNFSF15, NLRP3, LGALS9, MIF, CASP4, CCR5, CLEC4E, CD274, IFNG, RAB27B, CLEC5A, HCAR2, IL1A, PTAFR, RAB27A	2.58E-4
GO:0044110~growth involved in symbiotic interaction	6	TNF, CAMP, ELANE, IFNG, MPO, CTSG	2.58E-4
GO:0044117~growth of symbiont in host	6	TNF, CAMP, ELANE, IFNG, MPO, CTSG	2.58E-4
GO:0050867~positive regulation of cell activation	16	AIF1, TLR4, NLRP3, IGHM, IL21, PDCD1LG2, LGALS9, ADA, MIF, IL12RB1, CCR2, CD274, IFNG, IRF1, IL15RA, PTAFR	2.59E-4
GO:0002285~lymphocyte activation involved in immune response	12	CLEC4E, LGALS3, CCR2, IFNG, GADD45G, IRF1, TLR4, AICDA, NLRP3, ADA, LGALS9, RAB27A	3.21E-4
GO:0051174~regulation of phosphorus metabolic process	43	XDH, GDF3, PODNL1, TNF, CYSLTR2, AIF1, CXCL9, TNFSF15, CCL8, TLR4, CXCL11, IGHM, CCL4, TLR8, CCL6, CXCL10, MIF, GLIPR2, BAK1, NLRC5, CHIL1, SH2D1B1, IFNG, LTF, PDGFC, NOS2, PRKAA2, GPNMB, IL1A, SOCS3, CAMP, PLXNB2, IL1RN, SOCS1, SLAMF8, IL21, LGALS9, ATF3, GADD45G, RIPK3, IRF1, GBP4, PTAFR	3.28E-4
GO:0002758~innate immune response-activating signal transduction	10	IFIH1, TNF, C1QBP, IRF1, LTF, TLR4, CLEC7A, TLR8, LGALS9, TNIP3	3.60E-4
GO:1901701~cellular response to oxygen-containing compound	32	TNF, PTGS2, AIF1, PRDX5, TLR4, CXCL10, MIF, CASP4, HK3, IFNG, GBP10, LTF, PDGFC, PRKAA2, NOS2, TNIP3, CEBPE, SOCS3, CAMP, SOCS1, FCGR4, NLRP3, STAT1, SOD2, LCN2, CYBB, IRF1, MPO, AICDA, GBP2, MGST1, PTAFR	4.48E-4
GO:0006809~nitric oxide biosynthetic process	8	TNF, PTGS2, GLA, AIF1, IFNG, TLR4, NOS2, SOD2	4.69E-4
GO:0048514~blood vessel morphogenesis	21	XDH, PTGS2, NGP, LGALS3, CYSLTR2, CAMP, C6, MMP19, ANPEP, STAT1, ANXA3, CXCL10, WARS, BAK1, CYBB, CHIL1, CCR5, HPSE, CCR2, IL1A, PLAU	5.285E-4
GO:0044406~adhesion of symbiont to host	5	GBP7, LTF, GBP2B, GBP3, GBP2	5.265E-4
GO:0046209~nitric oxide metabolic process	8	TNF, PTGS2, GLA, AIF1, IFNG, TLR4, NOS2, SOD2	6.065E-4
GO:0032689~negative regulation of interferon-gamma production	6	SH2D1B1, C1QBP, CD274, TLR4, LGALS9, PDCD1LG2	7.115E-4
GO:0032729~positive regulation of interferon-gamma production	8	IL12RB2, IL12RB1, IL23R, TNF, CCR2, TLR4, IL21, TLR8	7.15E-4
GO:0030097~hemopoiesis	28	TNF, PRTN3, SFXN1, IGHM, C1QC, ADA, BAK1, ARL11, CLEC4E, IFNG, IL15RA, LTF, TYROBP, BATF2, CEBPE, IL21, NLRP3, SIRPA, LGALS9, SOD2, GADD45G, CCR2, IRF1, RIPK3, UBD, CLEC5A, SNX10, CLEC1B	7.68E-4
GO:0050792~regulation of viral process	15	IL23R, TNF, BST2, STAT1, CCL4, IFIT1, SLC1A3, IL12RB1, C1QBP, MB21D1, TAP1, SERPINB10, LTF, SLPI, GBP4	7.92E-4
GO:0032268~regulation of cellular protein metabolic process	53	GDF3, PODNL1, S100A8, AIF1, S100A9, TNFSF15, SERPINA3F, TLR4, IGHM, TLR8, BAK1, SH2D1B1, IFNG, LTF, PDGFC, IL1A, NGP, SOCS3, CAMP, PLXNB2, SOCS1, NLRP3, IL21, C1QBP, PSME1, CST7, GADD45G, RIPK3, SLPI, CTSC, GBP4, PTAFR, XDH, TNF, CYSLTR2, C6, CCL8, CCL4, CCL6, MIF, GLIPR2, CHIL1, SERPINB10, GPNMB, IL1RN, STAT1, LGALS9, TNFSF10, ATF3, CASP12, IRF1, RNF19B, RIDA	8.90E-4
GO:0050708~regulation of protein secretion	18	TNF, SOCS1, TNFSF15, TLR4, NLRP3, ANXA4, LGALS9, TLR8, MIF, CASP4, CCR5, CLEC4E, IFNG, CD274, NOS2, CLEC5A, HCAR2, IL1A	9.41E-4
GO:1903428~positive regulation of reactive oxygen species biosynthetic process	7	TNF, PTGS2, AIF1, IFNG, TLR4, SOD2, RAB27A	0.001
GO:0045766~positive regulation of angiogenesis	10	CYBB, LGALS3, PTGS2, CHIL1, CCR5, CYSLTR2, CAMP, C6, ANXA3, IL1A	0.001
GO:0032732~positive regulation of interleukin-1 production	6	CASP4, CCR5, IFNG, TLR4, NLRP3, LGALS9	0.001
GO:0071621~granulocyte chemotaxis	9	S100A8, LGALS3, C1QBP, S100A9, IFNG, CCL8, CCL4, CCL6, FCGR3	0.001
GO:1903532~positive regulation of secretion by cell	17	TNF, LGALS3, TNFSF15, NLRP3, LGALS9, MIF, CASP4, CCR5, CLEC4E, CD274, IFNG, RAB27B, CLEC5A, HCAR2, IL1A, PTAFR, RAB27A	0.001
GO:1903426~regulation of reactive oxygen species biosynthetic process	8	TNF, PTGS2, GLA, AIF1, IFNG, TLR4, SOD2, RAB27A	0.001
GO:0050714~positive regulation of protein secretion	13	TNF, TNFSF15, NLRP3, LGALS9, MIF, CASP4, CCR5, CLEC4E, IFNG, CD274, HCAR2, CLEC5A, IL1A	0.001
GO:0001944~vasculature development	23	XDH, PTGS2, NGP, LGALS3, SOCS3, CYSLTR2, CAMP, C6, MMP19, ANPEP, STAT1, ANXA3, CXCL10, WARS, BAK1, CYBB, CHIL1, CCR5, HPSE, CCR2, IFNG, IL1A, PLAU	0.001
GO:0002520~immune system development	29	TNF, PRTN3, SFXN1, IGHM, C1QC, ADA, BAK1, ARL11, CLEC4E, IFNG, LTF, IL15RA, TYROBP, BATF2, CEBPE, IL21, NLRP3, SIRPA, LGALS9, SOD2, CCR2, GADD45G, RIPK3, IRF1, UBD, AICDA, CLEC5A, SNX10, CLEC1B	0.0012
GO:0002705~positive regulation of leukocyte mediated immunity	9	TNF, SH2D1B1, IFNG, IL21, NLRP3, FCGR1, LAG3, PTAFR, FCGR3	0.002
GO:0048534~hematopoietic or lymphoid organ development	28	TNF, PRTN3, SFXN1, IGHM, C1QC, ADA, BAK1, ARL11, CLEC4E, IFNG, IL15RA, LTF, TYROBP, BATF2, CEBPE, IL21, NLRP3, SIRPA, LGALS9, SOD2, GADD45G, CCR2, IRF1, RIPK3, UBD, CLEC5A, SNX10, CLEC1B	0.002
GO:0072376~protein activation cascade	8	C1QA, C1QB, C1QBP, CFB, F13A1, C6, IGHM, C1QC	0.002
GO:0008284~positive regulation of cell proliferation	28	NAMPT, TNF, PTGS2, AIF1, TLR4, IGHM, ADA, CXCL10, MIF, IL12RB1, HPSE, IFNG, TGM2, LTF, PDGFC, LGALS3, CAMP, ELANE, IL21, STAT1, PDCD1LG2, PLAC8, PLA2G4A, ATF3, CCR2, CD274, PTAFR, PLAU	0.002
GO:0032637~interleukin-8 production	7	TNF, CHIL1, ELANE, TLR4, NOS2, ANXA4, TLR8	0.002
GO:0002228~natural killer cell mediated immunity	7	SH2D1B1, TAP1, RNF19B, IL21, LAG3, LGALS9, RAB27A	0.002
GO:0048247~lymphocyte chemotaxis	7	CCR2, CCL8, CXCL11, CCL4, LGALS9, CCL6, CXCL10	0.002
GO:0019538~protein metabolic process	96	GDF3, PODNL1, S100A8, AIF1, CNDP2, LGMN, F13A1, MMP8, S100A9, TNFSF15, SERPINA3F, TLR4, HP, ANPEP, IGHM, C1QC, TLR8, BAK1, WARS, CASP4, SH2D1B1, CASP7, IFNG, LTF, PRSS34, PDGFC, MLKL, NOS2, IL1A, LAG3, F10, NGP, SOCS3, PLXNB2, CAMP, ELANE, SOCS1, MMP19, SAA3, GZMB, MCPT8, IL21, NLRP3, LAP3, C1QA, C1QB, GZMK, PSME1, C1QBP, CST7, CCR2, GADD45G, RIPK3, SLPI, UBD, CTSC, GBP4, CTSG, PTAFR, XDH, PSMB10…	0.002
GO:0007596~blood coagulation	11	F10, GP6, F5, HPSE, F13A1, S100A9, TLR4, PDGFC, PLAU, ITGA2B, RAB27A	0.002
GO:0045428~regulation of nitric oxide biosynthetic process	7	TNF, PTGS2, GLA, AIF1, IFNG, TLR4, SOD2	0.002
GO:0002690~positive regulation of leukocyte chemotaxis	8	C1QBP, AIF1, CCR2, PLA2G7, CXCL9, CXCL11, CCL4, CXCL10	0.002
GO:1904018~positive regulation of vasculature development	10	CYBB, LGALS3, PTGS2, CHIL1, CCR5, CYSLTR2, CAMP, C6, ANXA3, IL1A	0.002
GO:0043085~positive regulation of catalytic activity	28	XDH, TNF, S100A8, S100A9, TNFSF15, CCL8, TLR4, IGHM, CCL4, CCL6, MIF, BAK1, CHIL1, IFNG, LTF, PDGFC, NOS2, SOCS1, IL1RN, NLRP3, STAT1, LGALS9, TNFSF10, RGS1, GADD45G, CASP12, RIPK3, PTAFR	0.002
GO:0048661~positive regulation of smooth muscle cell proliferation	8	NAMPT, TNF, PTGS2, AIF1, ELANE, TGM2, STAT1, PTAFR	0.002
GO:0045824~negative regulation of innate immune response	6	NLRC5, SH2D1B1, TAP1, SLAMF8, TRAFD1, LGALS9	0.002
GO:0007599~hemostasis	11	F10, GP6, F5, HPSE, F13A1, S100A9, TLR4, PDGFC, PLAU, ITGA2B, RAB27A	0.003
GO:0006796~phosphate-containing compound metabolic process	60	GDF3, NAMPT, PODNL1, AIF1, TNFSF15, TLR4, IGHM, CXCL11, TLR8, CXCL10, NLRC5, BAK1, SH2D1B1, OASL2, IFNG, LTF, MLKL, PDGFC, NOS2, IL1A, SOCS3, PLXNB2, CAMP, SOCS1, SAA3, IL21, MB21D1, GADD45G, RIPK3, PLA2G7, GBP4, PTAFR, CTSG, XDH, TNF, CYSLTR2, CXCL9, UPP1, CCL8, CCL4, ADA, MIF, CCL6, IL12RB2, GLIPR2, IL12RB1, CHIL1, HK3, PRKAA2, GPNMB, ACSL5, PLA2G15, IL1RN, SLAMF8, LGALS9, PPA1, PLA2G4A, ATF3, …	0.003
GO:0072678~T cell migration	6	AIF1, CCR2, RIPK3, CXCL11, LGALS9, CXCL10	0.003
GO:0002691~regulation of cellular extravasation	5	ELANE, CCR2, RIPK3, PTAFR, IL1A	0.003
GO:1904407~positive regulation of nitric oxide metabolic process	6	TNF, PTGS2, AIF1, IFNG, TLR4, SOD2	0.003
GO:0032612~interleukin-1 production	7	CASP4, GBP5, CCR5, IFNG, TLR4, NLRP3, LGALS9	0.004
GO:0032653~regulation of interleukin-10 production	6	IL23R, CD274, TLR4, IL21, LGALS9, PDCD1LG2	0.004
GO:0051341~regulation of oxidoreductase activity	7	TNF, GLA, IFNG, RIPK3, SLAMF8, HP, LGALS9	0.004
GO:0042060~wound healing	16	F10, S100A8, F13A1, S100A9, FCGR4, TLR4, GP6, F5, HPSE, CCR2, PDGFC, MYOF, IL1A, PLAU, RAB27A, ITGA2B	0.004
GO:0006956~complement activation	7	C1QA, C1QB, C1QBP, CFB, C6, IGHM, C1QC	0.004
GO:2000401~regulation of lymphocyte migration	6	AIF1, CCR2, RIPK3, CCL4, LGALS9, CXCL10	0.005
GO:0032755~positive regulation of interleukin-6 production	7	TNF, CCR5, IFNG, TLR4, PTAFR, LGALS9, IL1A	0.005
GO:0007165~signal transduction	102	GDF3, PTGS2, S100A8, SHTN1, AIF1, LGMN, S100A9, TNFSF15, TLR4, CXCL11, IGHM, TLR8, CXCL10, BAK1, NLRC5, ARL11, CLEC4E, IFNG, IL15RA, PDGFC, RAB27B, HCAR2, IL1A, RAB27A, F10, BST2, SOCS3, PLXNB2, SOCS1, IL21, CCR5, CCR2, RIPK3, ITGA2B, XDH, OLFM4, IFIH1, CSF2RB2, CYSLTR2, CCL8, CCL4, ADA, GPR141, CCL6, CHIL1, IIGP1, TYROBP, IL23R, LGALS3, IL1RN, ADGRG7, VDAC2, FCGR1, LGALS9, FCGR3, GPR33, LCN2, TN…	0.005
GO:0032602~chemokine production	7	TNF, ELANE, IFNG, TLR4, LGALS9, IL1A, MIF	0.005
GO:0032613~interleukin-10 production	6	IL23R, CD274, TLR4, IL21, LGALS9, PDCD1LG2	0.005
GO:0048659~smooth muscle cell proliferation	9	NAMPT, TNF, PTGS2, AIF1, ELANE, IFNG, TGM2, STAT1, PTAFR	0.005
GO:0032642~regulation of chemokine production	7	TNF, ELANE, IFNG, TLR4, LGALS9, IL1A, MIF	0.005
GO:0030728~ovulation	5	PLA2G4A, PTGS2, MMP19, NOS2, PLAU	0.006
GO:0048660~regulation of smooth muscle cell proliferation	9	NAMPT, TNF, PTGS2, AIF1, ELANE, IFNG, TGM2, STAT1, PTAFR	0.007
GO:0002286~T cell activation involved in immune response	8	CLEC4E, LGALS3, CCR2, IFNG, GADD45G, IRF1, NLRP3, RAB27A	0.007
GO:0032722~positive regulation of chemokine production	6	TNF, IFNG, TLR4, LGALS9, IL1A, MIF	0.007
GO:0010604~positive regulation of macromolecule metabolic process	57	NAMPT, GDF3, S100A8, AIF1, S100A9, TNFSF15, TLR4, IGHM, TLR8, NLRC5, BAK1, SH2D1B1, IFNG, LTF, PDGFC, SPIC, IL1A, RAB27A, CAMP, ELANE, SOCS1, NLRP3, IL21, CCR5, C1QBP, GADD45G, CCR2, RIPK3, CTSC, AICDA, PTAFR, XDH, TNF, CYSLTR2, C6, CCL8, GSAP, CCL4, MIF, CCL6, GLIPR2, CHIL1, GPNMB, CEBPE, IL1RN, STAT1, ANXA3, LGALS9, PLAC8, FCGR3, LCN2, CYBB, TNFSF10, ATF3, CASP12, IRF1, RNF19B	0.008
GO:0006801~superoxide metabolic process	6	CYBB, TNF, MPO, NOS2, PON3, SOD2	0.008
GO:0051336~regulation of hydrolase activity	25	XDH, TNF, NGP, S100A8, PLXNB2, S100A9, TNFSF15, CCL8, SERPINA3F, NLRP3, STAT1, CCL4, CCL6, PSMB9, BAK1, TNFSF10, RGS1, CST7, IFNG, CASP12, RIPK3, SERPINB10, SLPI, LTF, PTAFR	0.008
GO:0002695~negative regulation of leukocyte activation	9	LST1, LGALS3, CCR2, CD274, IRF1, GPNMB, LAG3, LGALS9, PDCD1LG2	0.009
GO:0002444~myeloid leukocyte mediated immunity	7	ELANE, CCR2, FCGR1, PTAFR, ANXA3, CTSG, FCGR3	0.009
GO:0002700~regulation of production of molecular mediator of immune response	8	TNF, BST2, IFNG, TLR4, IL21, NLRP3, IGHM, MIF	0.009
GO:1902107~positive regulation of leukocyte differentiation	9	TNF, CCR2, IFNG, IRF1, IL15RA, IL21, NLRP3, ADA, LGALS9	0.010
GO:1902105~regulation of leukocyte differentiation	12	TNF, CCR2, IFNG, IRF1, LTF, IL15RA, IL21, NLRP3, C1QC, ADA, LGALS9, TYROBP	0.010
GO:0060627~regulation of vesicle-mediated transport	16	SIGLECE, TNF, LGALS3, PRTN3, IGHM, SIRPA, FCGR1, LGALS9, FCGR3, PLA2G4A, SYNE1, CCR2, IFNG, RAB27B, PTAFR, RAB27A	0.010
GO:0032652~regulation of interleukin-1 production	6	CASP4, CCR5, IFNG, TLR4, NLRP3, LGALS9	0.010
GO:0032635~interleukin-6 production	8	TNF, CCR5, IFNG, TLR4, NOS2, PTAFR, LGALS9, IL1A	0.011
GO:0002292~T cell differentiation involved in immune response	6	CLEC4E, CCR2, IFNG, GADD45G, IRF1, NLRP3	0.011
GO:1902532~negative regulation of intracellular signal transduction	16	XDH, OLFM4, PODNL1, SOCS3, SOCS1, TLR4, STAT1, VDAC2, NLRP3, SOD2, MIF, ATF3, C1QBP, IRF1, PRKAA2, TNIP3	0.012
GO:2000403~positive regulation of lymphocyte migration	5	AIF1, CCR2, CCL4, LGALS9, CXCL10	0.012
GO:0002693~positive regulation of cellular extravasation	4	ELANE, CCR2, PTAFR, IL1A	0.013
GO:0051818~disruption of cells of other organism involved in symbiotic interaction	4	CCR5, CAMP, ELANE, CTSG	0.013
GO:0002718~regulation of cytokine production involved in immune response	6	TNF, BST2, TLR4, IL21, NLRP3, MIF	0.013
GO:0050920~regulation of chemotaxis	10	C1QBP, AIF1, CCR2, PLA2G7, CXCL9, SLAMF8, CXCL11, CCL4, LGALS9, CXCL10	0.013
GO:0042743~hydrogen peroxide metabolic process	5	CYBB, MPO, PRDX5, HP, SOD2	0.014
GO:0051250~negative regulation of lymphocyte activation	8	LST1, LGALS3, CD274, IRF1, GPNMB, LAG3, LGALS9, PDCD1LG2	0.016
GO:0050866~negative regulation of cell activation	9	LST1, LGALS3, CCR2, CD274, IRF1, GPNMB, LAG3, LGALS9, PDCD1LG2	0.017
GO:0050921~positive regulation of chemotaxis	8	C1QBP, AIF1, CCR2, PLA2G7, CXCL9, CXCL11, CCL4, CXCL10	0.017
GO:0097190~apoptotic signaling pathway	18	TNF, S100A8, LGALS3, S100A9, GZMB, VDAC2, SOD2, MIF, LCN2, BAK1, TNFSF10, CASP4, ATF3, IFNG, CASP12, RIPK3, CTSC, IL1A	0.018
GO:0048525~negative regulation of viral process	7	TNF, BST2, C1QBP, LTF, SLPI, STAT1, CCL4	0.018
GO:0042269~regulation of natural killer cell mediated cytotoxicity	5	SH2D1B1, TAP1, IL21, LAG3, LGALS9	0.018
GO:0000302~response to reactive oxygen species	10	LCN2, BAK1, TNF, HK3, MPO, PRDX5, HP, STAT1, ADA, SOD2	0.019
GO:0051222~positive regulation of protein transport	16	TNF, PTGS2, TNFSF15, TLR4, NLRP3, RHOU, LGALS9, MIF, CASP4, CLEC4E, CCR5, CD274, IFNG, CLEC5A, HCAR2, IL1A	0.019
GO:0006910~phagocytosis, recognition	5	CLEC7A, IGHM, FCGR1, SIRPA, FCGR3	0.020
GO:0002455~humoral immune response mediated by circulating immunoglobulin	6	C1QA, C1QB, TNF, C1QBP, IGHM, C1QC	0.020
GO:0030857~negative regulation of epithelial cell differentiation	5	XDH, GDF3, IFNG, STAT1, IL1A	0.021
GO:0010324~membrane invagination	6	SIGLECE, AIF1, IGHM, FCGR1, SIRPA, FCGR3	0.021
GO:0002474~antigen processing and presentation of peptide antigen via MHC class I	6	PSMB10, H2-Q4, TAP1, FCGR1, FCGR3, PSMB9	0.023
GO:0048646~anatomical structure formation involved in morphogenesis	30	GDF3, TNF, PTGS2, CYSLTR2, C6, MMP8, CXCL9, CCL8, ANPEP, ADA, CXCL10, WARS, BAK1, CHIL1, HPSE, TGM2, IL1A, LGALS3, NGP, CAMP, PLXNB2, MMP19, STAT1, ANXA3, CYBB, CCR5, CCR2, PLAU, SNX10, CLEC1B	0.023
GO:0030100~regulation of endocytosis	10	SIGLECE, SYNE1, TNF, LGALS3, PRTN3, IGHM, FCGR1, SIRPA, FCGR3, RAB27A	0.024
GO:0050901~leukocyte tethering or rolling	4	TNF, ELANE, CCR2, PTAFR	0.025
GO:0002367~cytokine production involved in immune response	6	TNF, BST2, TLR4, IL21, NLRP3, MIF	0.027
GO:0050832~defense response to fungus	4	ELANE, LTF, MPO, CTSG	0.028
GO:0032621~interleukin-18 production	3	GBP5, TNF, NLRP3	0.029
GO:0071260~cellular response to mechanical stimulus	6	BAK1, CASP4, PTGS2, IRF1, TLR4, TLR8	0.031
GO:1903708~positive regulation of hemopoiesis	9	TNF, CCR2, IFNG, IRF1, IL15RA, IL21, NLRP3, ADA, LGALS9	0.031
GO:0032102~negative regulation of response to external stimulus	11	SIGLECE, C1QBP, SOCS3, AIF1, AOAH, LTF, SLAMF8, NLRP3, ADA, PLAU, LGALS9	0.031
GO:0022408~negative regulation of cell-cell adhesion	8	LGALS3, IL1RN, CD274, IRF1, GPNMB, LAG3, LGALS9, PDCD1LG2	0.031
GO:0051223~regulation of protein transport	21	TNF, PTGS2, SOCS1, TNFSF15, TLR4, NLRP3, RHOU, ANXA4, LGALS9, TLR8, MIF, CASP4, CCR5, CLEC4E, IFNG, CD274, NOS2, GBP4, CLEC5A, HCAR2, IL1A	0.032
GO:0030098~lymphocyte differentiation	13	BAK1, CLEC4E, CCR2, IFNG, GADD45G, RIPK3, IRF1, IL15RA, IL21, NLRP3, IGHM, ADA, LGALS9	0.033
GO:0002704~negative regulation of leukocyte mediated immunity	5	SH2D1B1, BST2, TAP1, CCR2, LGALS9	0.034
GO:0051817~modification of morphology or physiology of other organism involved in symbiotic interaction	6	CCR5, CAMP, ELANE, LTF, CCL4, CTSG	0.035
GO:0050728~negative regulation of inflammatory response	7	SIGLECE, SOCS3, AOAH, SLAMF8, NLRP3, ADA, LGALS9	0.035
GO:0051712~positive regulation of killing of cells of other organism	3	CCR5, IFNG, NOS2	0.036
GO:0031667~response to nutrient levels	14	GDF3, GATM, PTGS2, UPP1, STAT1, ADA, SOD2, CXCL10, LCN2, CYBB, ATF3, IL15RA, MPO, PRKAA2	0.038
GO:0009968~negative regulation of signal transduction	25	XDH, GDF3, OLFM4, TNF, PODNL1, LGMN, TLR4, ADA, MIF, NLRC5, LTF, PRKAA2, TNIP3, LGALS3, SOCS3, SOCS1, IL1RN, NLRP3, STAT1, VDAC2, SOD2, RGS1, ATF3, C1QBP, IRF1	0.038
GO:0032655~regulation of interleukin-12 production	5	IL23R, C1QBP, IFNG, IRF1, TLR4	0.038
GO:0050688~regulation of defense response to virus	8	IFIT1, IL12RB1, IL23R, SLC1A3, C1QBP, MB21D1, SERPINB10, GBP4	0.040
GO:0036230~granulocyte activation	4	CCR2, PTAFR, ANXA3, TYROBP	0.041
GO:0034340~response to type I interferon	4	NLRC5, IFIT1, STAT1, ZBP1	0.041
GO:0032675~regulation of interleukin-6 production	7	TNF, CCR5, IFNG, TLR4, PTAFR, LGALS9, IL1A	0.042
GO:0002294~CD4-positive, alpha-beta T cell differentiation involved in immune response	5	CCR2, IFNG, GADD45G, IRF1, NLRP3	0.043
GO:0001659~temperature homeostasis	5	TNF, PTGS2, CCR5, IL1RN, IL1A	0.043
GO:1901136~carbohydrate derivative catabolic process	7	CHIL1, GLA, HPSE, CHIL3, UPP1, AICDA, ADA	0.043
GO:0048871~multicellular organismal homeostasis	12	XDH, PLA2G4A, TNF, PTGS2, CCR5, IL1RN, CCR2, LTF, TLR4, MUC13, IL1A, CD7	0.044
GO:0031622~positive regulation of fever generation	3	TNF, PTGS2, CCR5	0.044
GO:0008285~negative regulation of cell proliferation	18	XDH, LST1, TNF, PTGS2, LGALS3, AIF1, STAT1, PDCD1LG2, LGALS9, SOD2, BAK1, CCR5, CD274, IFNG, IRF1, GPNMB, RIDA, IL1A	0.044
GO:0031644~regulation of neurological system process	6	TNF, IFNG, FCGR4, TLR4, PTAFR, IL1A	0.044
GO:0002478~antigen processing and presentation of exogenous peptide antigen	5	PSMB10, TAP1, FCGR1, FCGR3, PSMB9	0.044
GO:0002293~alpha-beta T cell differentiation involved in immune response	5	CCR2, IFNG, GADD45G, IRF1, NLRP3	0.044
GO:0032677~regulation of interleukin-8 production	5	TNF, ELANE, TLR4, ANXA4, TLR8	0.044
GO:0006958~complement activation, classical pathway	5	C1QA, C1QB, C1QBP, IGHM, C1QC	0.044
GO:0043270~positive regulation of ion transport	10	BAK1, LGALS3, CXCL9, CXCL11, CCL4, PTAFR, IL1A, MIF, ACSL5, CXCL10	0.047
GO:0002287~alpha-beta T cell activation involved in immune response	5	CCR2, IFNG, GADD45G, IRF1, NLRP3	0.047
GO:0032615~interleukin-12 production	5	IL23R, C1QBP, IFNG, IRF1, TLR4	0.047
GO:0045661~regulation of myoblast differentiation	5	GDF3, TNF, CXCL9, CCL8, CXCL10	0.047
GO:0042116~macrophage activation	5	AIF1, TLR4, TLR8, LGALS9, TYROBP	0.047
GO:0002429~immune response-activating cell surface receptor signaling pathway	8	GPR33, LGALS3, IFNG, FPR1, CLEC7A, FPR2, IGHM, ADA	0.047
GO:0051851~modification by host of symbiont morphology or physiology	5	CAMP, ELANE, LTF, CCL4, CTSG	0.049

## Sheet: GO_BP Terms in PBS
GO_BP Terms enriched with DEGs uniquely expressed in PBS mice at 16 weeks post L. infantum challenge
GO_TERM_BP_4	Count	Genes	Benjamini-adjusted p-value
GO:0006954~inflammatory response	18	IL1F9, SELP, C5AR1, OLR1, TLR13, PPARG, ANXA1, PGLYRP1, PF4, FPR3, MAPKAPK2, PSMB4, LTB4R1, NAIP2, FCER1G, ALOX5, XCL1, NR1H3	2.56E-5
GO:0051707~response to other organism	22	C5AR1, SLFN9, TLR13, PRG2, PGLYRP1, PF4, MAPKAPK2, OAS2, AP1S1, NAIP2, WFDC21, EPX, CPA3, FCER1G, MYOM1, XCL1, CASP1, MX1, IFIT1BL1, TREM3, CD300LB, NR1H3	4.54E-5
GO:0001819~positive regulation of cytokine production	14	TIGIT, IL1F9, C5AR1, PRG3, MAPK13, EPX, PRG2, FCNB, ANXA1, FCER1G, PF4, MAPKAPK2, CASP1, XCL1	3.17E-5
GO:0031347~regulation of defense response	14	FCNB, PPARG, TLR13, PGLYRP1, ANXA1, MAPKAPK2, PSMB4, FCER1G, CPA3, ZYX, MYOM1, XCL1, CASP1, NR1H3	0.005
GO:0098542~defense response to other organism	14	C5AR1, SLFN9, TLR13, PRG2, PGLYRP1, OAS2, NAIP2, EPX, FCER1G, CPA3, MYOM1, MX1, TREM3, IFIT1BL1	0.005
GO:0050866~negative regulation of cell activation	8	TIGIT, CASP3, GP5, LRRC32, PGLYRP1, ANXA1, XCL1, NR1H3	0.006
GO:0050900~leukocyte migration	10	SELP, C5AR1, MMP9, EPX, ANXA1, FCER1G, FPR3, PF4, XCL1, TREM3	0.006
GO:0032653~regulation of interleukin-10 production	5	TIGIT, EPX, PRG2, FCER1G, XCL1	0.014
GO:0001818~negative regulation of cytokine production	8	TIGIT, LRRC32, EPX, PPARG, PRG2, PGLYRP1, ANXA1, XCL1	0.018
GO:0032613~interleukin-10 production	5	TIGIT, EPX, PRG2, FCER1G, XCL1	0.016
GO:0050727~regulation of inflammatory response	9	PSMB4, PPARG, PGLYRP1, ANXA1, FCER1G, ZYX, CASP1, XCL1, NR1H3	0.015
GO:0002695~negative regulation of leukocyte activation	7	TIGIT, CASP3, LRRC32, PGLYRP1, ANXA1, XCL1, NR1H3	0.015
GO:0045087~innate immune response	13	IL1F9, FCNB, PPARG, TLR13, PGLYRP1, ANXA1, OAS2, MAPKAPK2, NAIP2, FCER1G, MX1, XCL1, NR1H3	0.014
GO:0019693~ribose phosphate metabolic process	11	PKM, ADSSL1, PYGL, PGD, CYCS, NDUFV2, ATP5F1, PFKP, PF4, COX5A, COX5B	0.017
GO:0002694~regulation of leukocyte activation	11	TIGIT, CASP3, LRRC32, PRAM1, PGLYRP1, ANXA1, FCER1G, XCL1, CD300LB, NR1H3, IFI204	0.017
GO:0016032~viral process	12	P4HB, AP1S1, MMP9, SLFN9, TLR13, FCNB, CPA3, OAS2, MYOM1, XCL1, MX1, IFIT1BL1	0.021
GO:0045321~leukocyte activation	14	PRG3, LRRC32, ANXA1, PGLYRP1, ADGRG3, TIGIT, CASP3, PRAM1, FCER1G, XCL1, CASP1, CD300LB, NR1H3, IFI204	0.021
GO:0097530~granulocyte migration	6	C5AR1, EPX, ANXA1, FCER1G, XCL1, TREM3	0.027
GO:0019637~organophosphate metabolic process	15	PKM, IMPA2, ADSSL1, PLEK, PYGL, CYCS, PGD, PGM1, NDUFV2, ATP5F1, PFKP, PF4, OAS2, COX5A, COX5B	0.031
GO:0007599~hemostasis	7	SELP, ZFP385A, GP5, PLEK, FCER1G, PF4, TREML1	0.032
GO:0051250~negative regulation of lymphocyte activation	6	TIGIT, CASP3, LRRC32, PGLYRP1, ANXA1, XCL1	0.034
GO:0010543~regulation of platelet activation	4	SELP, GP5, PLEK, FCER1G	0.035
GO:0044283~small molecule biosynthetic process	10	PKM, IMPA2, PRG3, PLEK, PGD, HACD4, ANXA1, ALOX5, PSAT1, NR1H3	0.035
GO:0009615~response to virus	9	AP1S1, SLFN9, TLR13, CPA3, OAS2, MYOM1, XCL1, MX1, IFIT1BL1	0.033
GO:0006082~organic acid metabolic process	14	P4HB, ADSSL1, PRG3, PPARG, HACD4, PGD, PFKP, ANXA1, DBI, PKM, HDC, ALOX5, PSAT1, NR1H3	0.034
GO:0034097~response to cytokine	12	SELP, IL1F9, GM12185, WFDC21, PPARG, MT2, ANXA1, PF4, MAPKAPK2, XCL1, RPS2, IFI204	0.039
GO:0043436~oxoacid metabolic process	13	PKM, ADSSL1, PRG3, HDC, PPARG, PGD, HACD4, ANXA1, PFKP, ALOX5, PSAT1, DBI, NR1H3	0.044
GO:0045088~regulation of innate immune response	7	TLR13, PPARG, FCNB, FCER1G, MAPKAPK2, XCL1, NR1H3	0.043

## Sheet: GO_BP Terms in p8-CPA
GO_BP Terms enriched with DEGs uniquely expressed in p8-CPA160-189 mice at 16 weeks post L. infantum challenge
GO_TERM_BP_4	Count	Genes	Benjamini-adjusted p-value
GO:0051707~response to other organism	19	IGH-VX24, ICAM1, CEBPB, HCK, 2610528J11RIK, D430041D05RIK, GNG12, CPS1, SRC, SOD2, TNFSF8, IGHG, IFIT2, APOB, P2RX7, CXCL16, EIF2AK2, IFIT1BL2, ADAMTS4	0.012

## Sheet: KEGG in COMMON DEGS
KEGG pathways enriched with DEGs commonly expressed in PBS and p8-CPA160-189 mice at 16 weeks post L. infantum challenge
KEGG pathway	Count	Genes	Benjamini-adjusted p-value
mmu04060:Cytokine-cytokine receptor interaction	19	IL23R, TNF, CSF2RB2, TNFSF15, CXCL9, CCL8, CXCL11, IL21, CCL4, CCL6, CXCL10, IL12RB2, TNFSF10, IL12RB1, CCR5, CCR2, IFNG, IL15RA, IL1A	1.84E-5
mmu05150:Staphylococcus aureus infection	10	C1QA, C1QB, CFB, FPR1, FCGR4, FPR2, FCGR1, C1QC, PTAFR, FCGR3	1.02E-5
mmu05140:Leishmaniasis	10	TNF, PTGS2, IFNG, FCGR4, TLR4, NOS2, STAT1, FCGR1, IL1A, FCGR3	6.14E-5
mmu05133:Pertussis	10	C1QA, C1QB, TNF, CASP7, IRF1, TLR4, NOS2, NLRP3, C1QC, IL1A	1.60E-4
mmu05321:Inflammatory bowel disease (IBD)	9	IL12RB2, IL12RB1, IL23R, TNF, IFNG, TLR4, STAT1, IL21, IL1A	1.99E-4
mmu04380:Osteoclast differentiation	12	CYBB, TNF, SOCS3, SOCS1, IFNG, FCGR4, STAT1, FCGR1, SIRPA, IL1A, FCGR3, TYROBP	2.36E-4
mmu04610:Complement and coagulation cascades	9	C1QA, C1QB, F10, F5, CFB, F13A1, C6, C1QC, PLAU	9.48E-4
mmu05152:Tuberculosis	12	TNF, CLEC4E, CAMP, IFNG, FCGR4, TLR4, NOS2, CLEC7A, STAT1, FCGR1, IL1A, FCGR3	0.004
mmu05020:Prion diseases	6	C1QA, C1QB, C6, CASP12, C1QC, IL1A	0.004
mmu05145:Toxoplasmosis	9	IRGM1, IGTP, TNF, CCR5, SOCS1, IFNG, TLR4, NOS2, STAT1	0.006
mmu05164:Influenza A	11	TNFSF10, IFIH1, TNF, SOCS3, IFNG, TLR4, STAT1, NLRP3, OAS1G, IL1A, CXCL10	0.009
mmu04630:Jak-STAT signaling pathway	10	IL12RB2, IL12RB1, IL23R, SOCS3, CSF2RB2, SOCS1, IFNG, IL15RA, STAT1, IL21	0.011
mmu05322:Systemic lupus erythematosus	10	C1QA, C1QB, TNF, C6, ELANE, IFNG, FCGR4, FCGR1, C1QC, CTSG	0.011
mmu04620:Toll-like receptor signaling pathway	8	TNF, CXCL9, TLR4, STAT1, CXCL11, CCL4, TLR8, CXCL10	0.019
mmu04145:Phagosome	10	TUBA8, MSR1, TAP1, FCGR4, MPO, TLR4, CLEC7A, FCGR1, TUBB3, FCGR3	0.027
mmu04668:TNF signaling pathway	8	TNF, PTGS2, SOCS3, CASP7, RIPK3, MLKL, GM5431, CXCL10	0.025
